# Supplementary material
Source: PubMed Central journal article supplement (PMC1409729)
Supplement: 7601006s1.pdf [file 7601006s1.pdf]

## Supplementary Figure 1

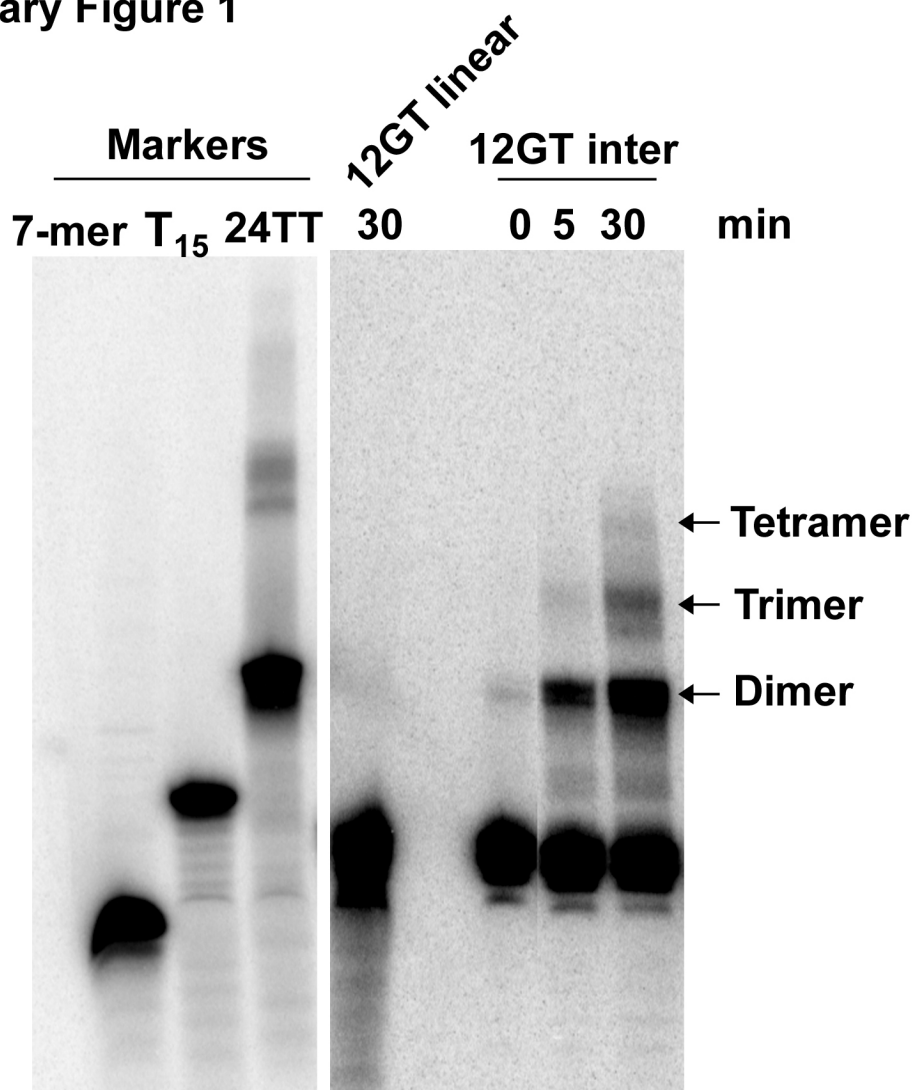

UV crosslinking of intermolecular 12GT G-quadruplex stabilised in Na<sup>+</sup> to determine strand stoichiometry. <sup>32</sup>P-labelled intermolecular 12GT G-quadruplex (99% purity; 43 μM) was crosslinked at 254 nm for 0-30 min at 25°C. Linear counterpart was crosslinked for 30 min as a negative control. 7mer, T<sub>15</sub> and 24TT were used as size markers. The crosslinked products were electrophoresed on a 14% denaturing gel.
