# Supplementary material
Source: PubMed Central journal article supplement (PMC1409729)
Supplement: 7601006s2.pdf [file 7601006s2.pdf]

# Supplementary Figure 2

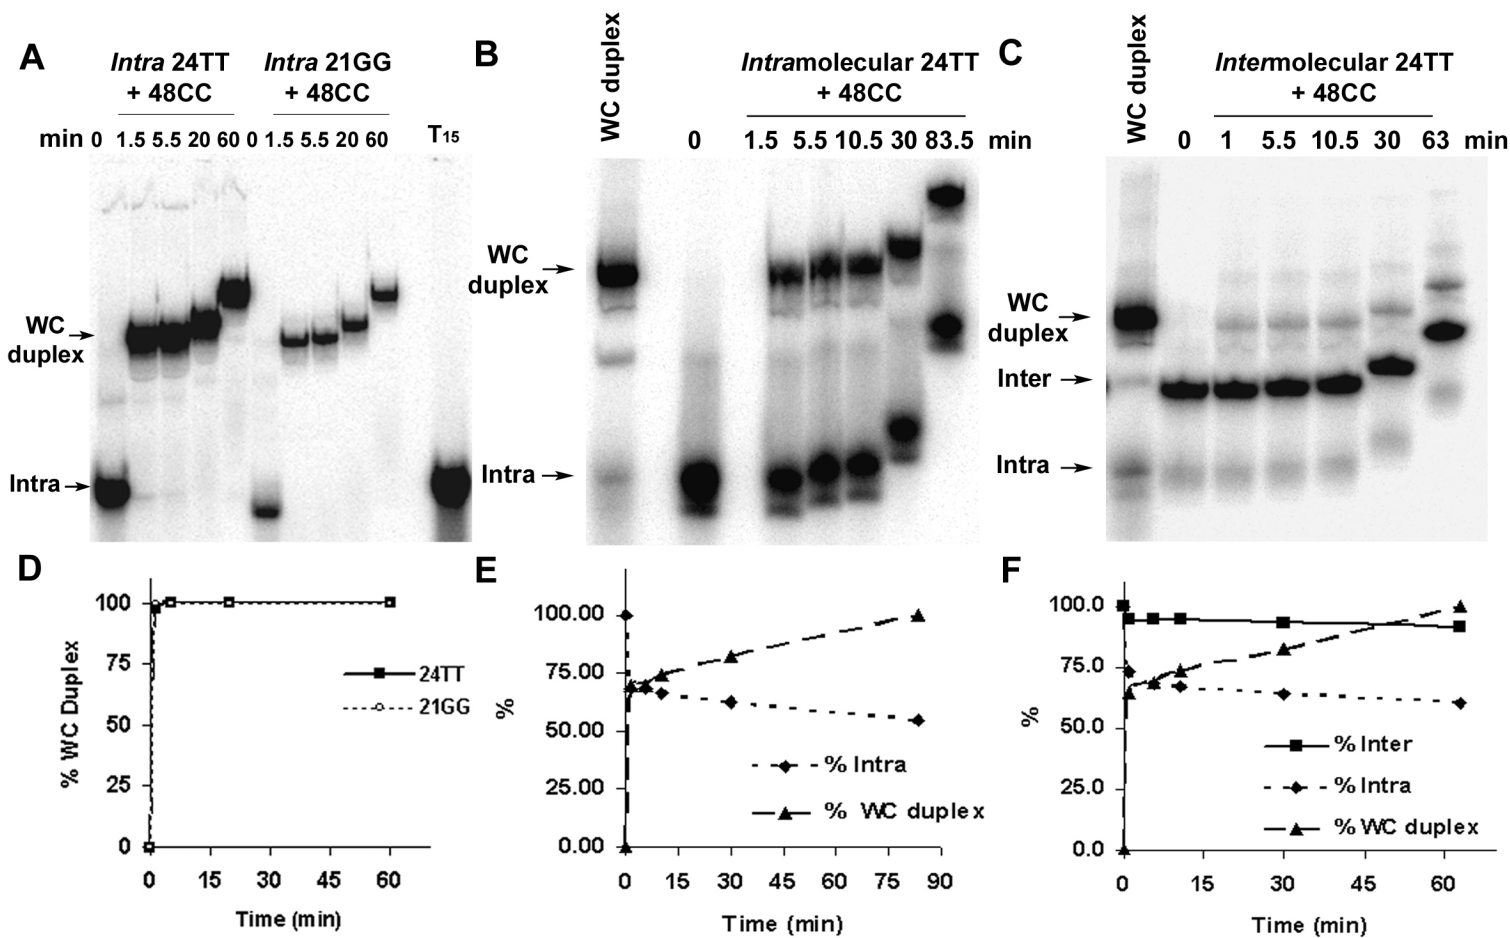

Complementary strand trap method for determining the rate of unfolding of gel purified intra- (A-B) and intermolecular (C) G-quadruplexes stabilised in the presence of 50 mM NaGlu (A) or KGlu (B-C). Pre-annealed Watson-Crick (WC) duplex was loaded as a marker for (B-C). All samples were loaded at the indicated time intervals and electrophoresed on 12% polyacrylamide 50 mM NaGlu or KGlu native gels.

**(A)** <sup>32</sup>P-labelled intramolecular Na<sup>+</sup>-stabilised 24TT and 21GG G-quadruplexes at 15.4 and 3.6 μM concentrations and 93% and 85% purities respectively were incubated with 10-fold excess of complementary DNA strand (48CC). T<sub>15</sub>: unstructured MW marker.

**(B)** <sup>32</sup>P-labelled intramolecular 24TT at 1 μM (>95% purity) was incubated with 10-fold excess 48CC.

**(C)** <sup>32</sup>P-labelled intermolecular 24TT at 36 μM (86% purity) was incubated with 5-fold excess 48CC.

Plots **(D-F)** present percentage of WC duplex formation in (A-C) respectively, as a function of time. Percentage of intra- and intermolecular G-quadruplex unfolding is also shown for B and C.
