# Supplementary material
Source: PubMed Central journal article supplement (PMC1409729)
Supplement: 7601006s4.pdf [file 7601006s4.pdf]

## Supplementary Figure 4

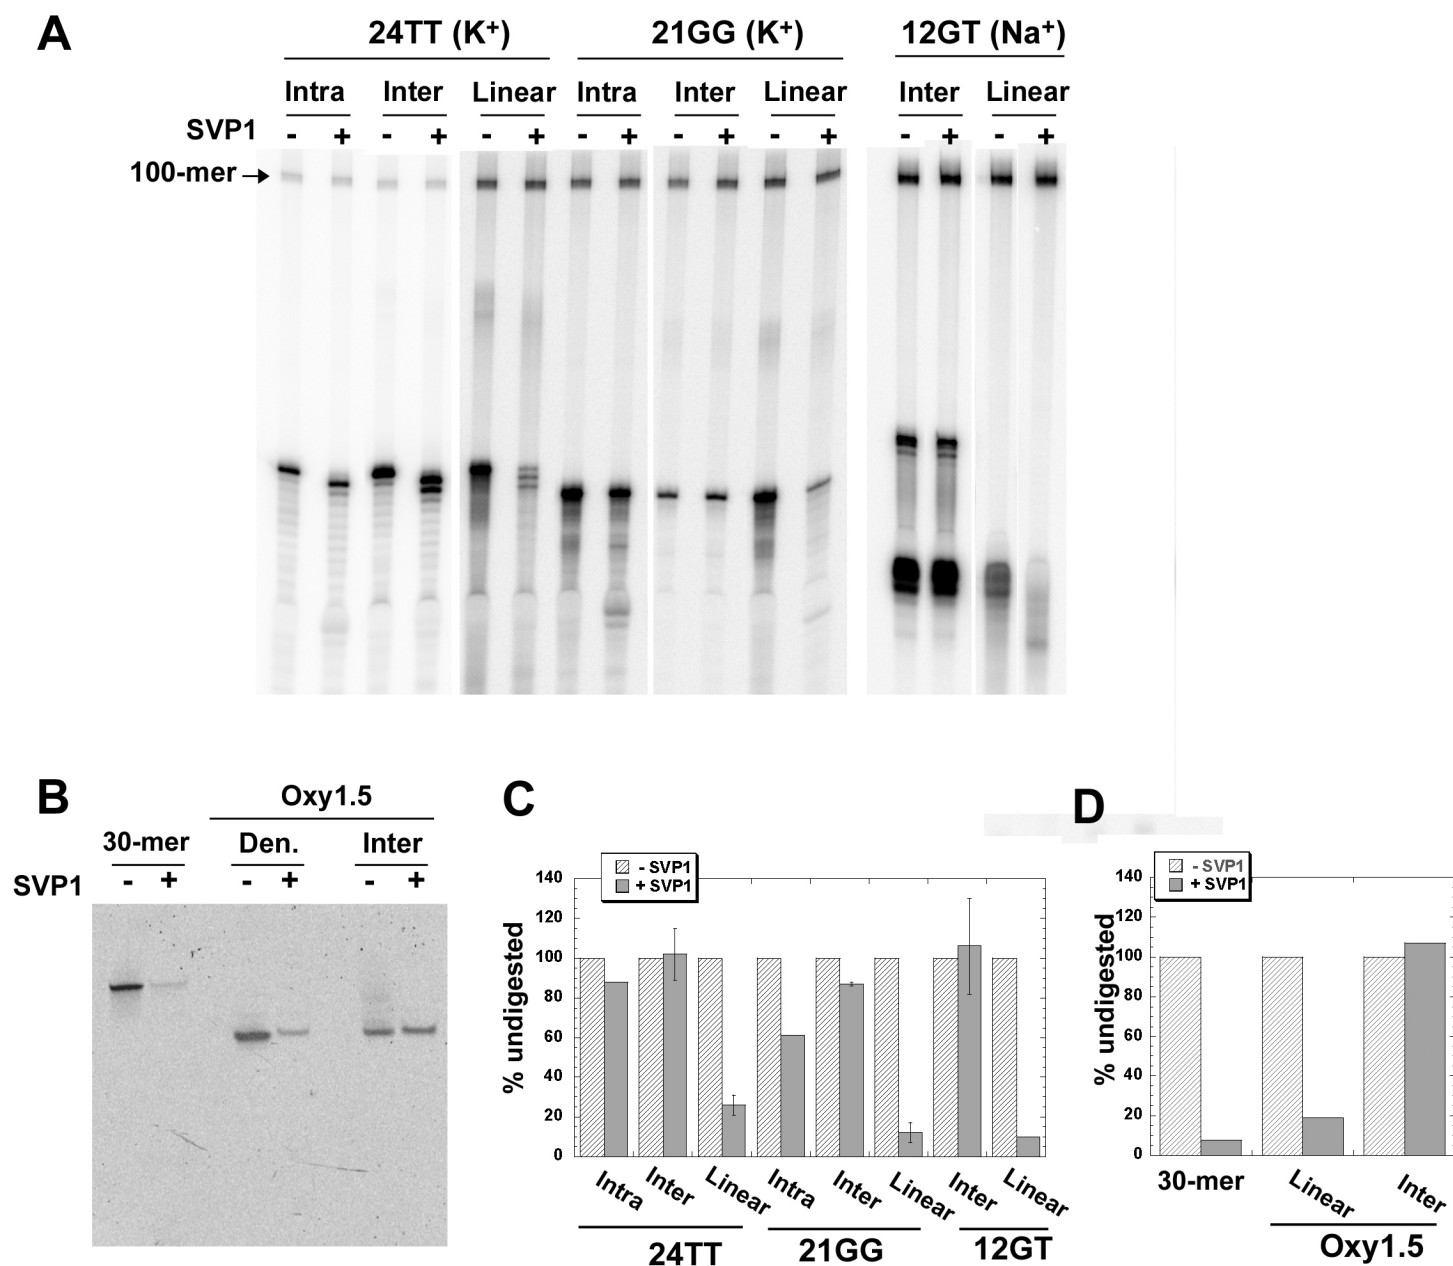

Snake Venom Phosphodiesterase I (SVPI) digestions of intra- and intermolecular *Tetrahymena* (A) and intermolecular *Euplotes* (B) G-quadruplexes. All *Tetrahymena* G-quadruplexes contain <sup>32</sup>P-label. Digestion products are electrophoresed on 10-20% polyacrylamide denaturing gels.

(A) 21GG and 24TT intra (~ 73% and 94% purities; 0.7 μM and 1.5 μM respectively) and intermolecular (~ 64% and 88% purities; 12 μM and 3 μM respectively) G-quadruplexes stabilised in K<sup>+</sup> and 12GT intermolecular quadruplex stabilised in Na<sup>+</sup> (~ 99% purity; 95 μM) and linear counterparts were incubated either in the presence or absence of SVP1 for 10 min at 25°C. Non-telomeric 100mer was used as a loading control. The proportion of undigested DNA (as a percentage of the -SVP1 control) is represented in (C). Error bars indicate standard deviation.

(B) 200 ng of Oxy 1.5 intermolecular G-quadruplex stabilised in K<sup>+</sup>, its denatured counterpart (“Den.”) and non-telomeric 30-mer control sequence were incubated with or without SVP1 for 25 min at 25°C. The proportion of undigested DNA (as a percentage of the -SVP1 control) is represented in (D).
