# Supplementary material
Source: PubMed Central journal article supplement (PMC1409729)
Supplement: 7601006s5.pdf [file 7601006s5.pdf]

## Supplementary Figure 5

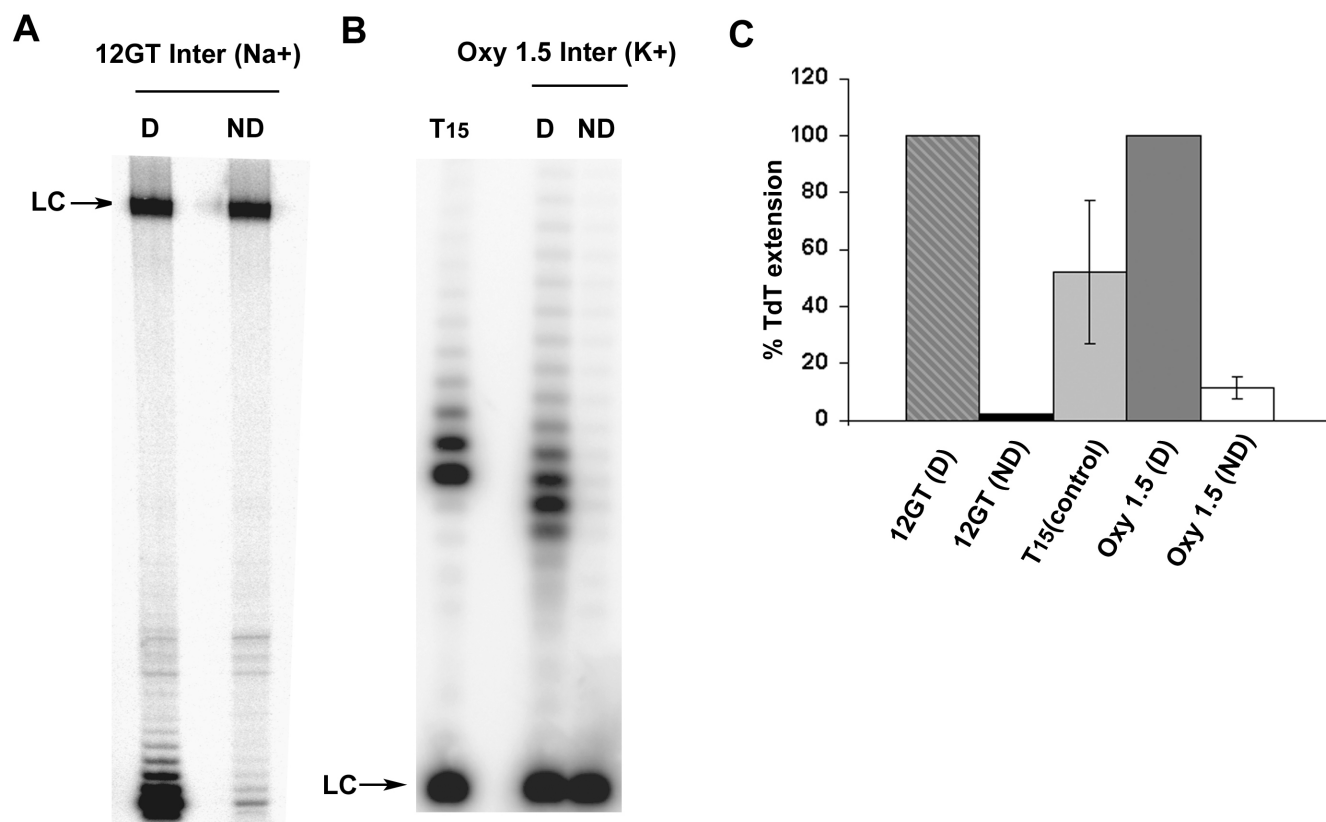

Terminal deoxytransferase (TdT) extensions of intermolecular *Tetrahymena* 12GT and *Euplotes* Oxy 1.5 G-quadruplexes. “D” and “ND” refer to heat denatured and non-denatured G-quadruplexes respectively. LC = loading control. The extension products were electrophoresed on 8-10 % polyacrylamide denaturing sequencing gels.

(A) Intermolecular Na<sup>+</sup>-stabilised 12GT G-quadruplex (~ 99% purity; 17 μM) or its denatured counterpart were incubated in the presence of TdT for 10 min at 25°C.

(B) 2 pmols of intermolecular K<sup>+</sup>-stabilised Oxy 1.5 G-quadruplex, its denatured counterpart and T<sub>15</sub> control primer were incubated in the presence of TdT for 60 min at 25°C.

(C) Graphical representation of the percentage of TdT extension of DNA, normalised to denatured quadruplex extension.
