# Supplementary material
Source: PubMed Central journal article supplement (PMC1409729)

### Supplementary Figure 3

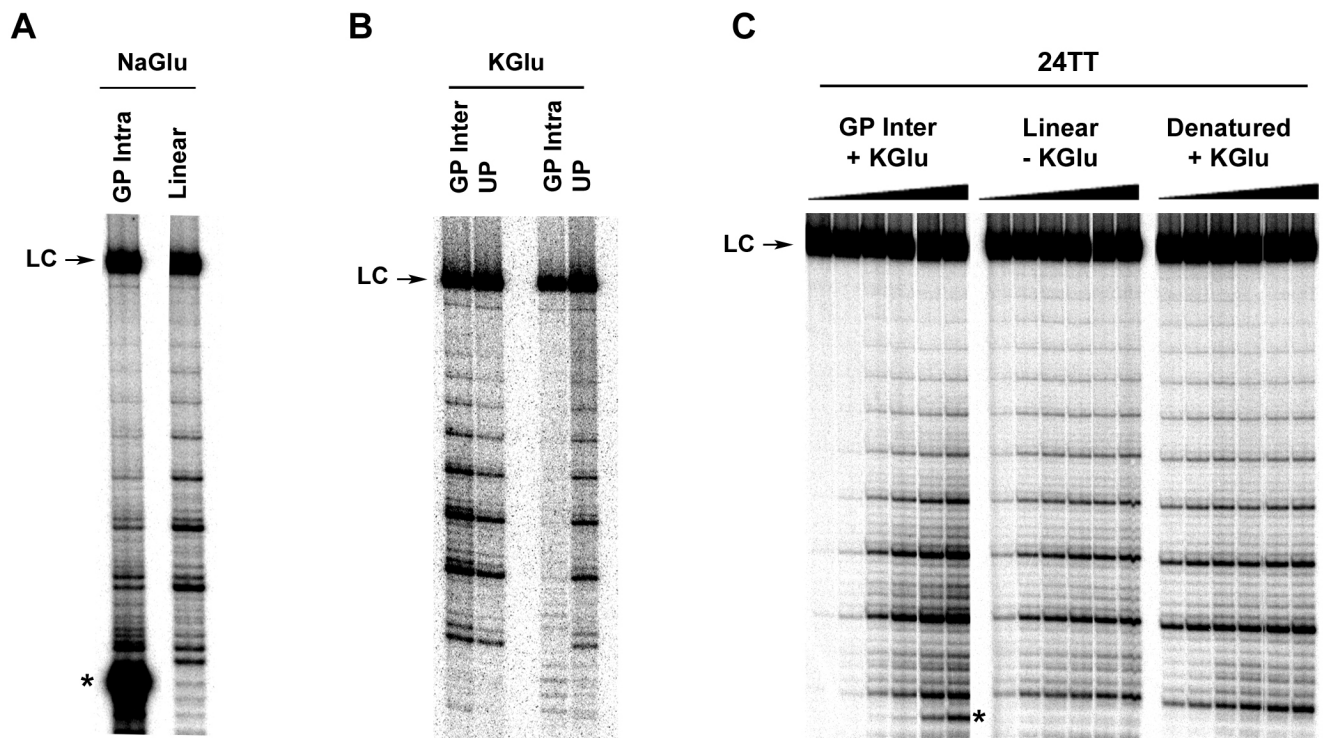

Supplement: 7601006s3.pdf [file 7601006s3.pdf]
